# Supplementary material for: Ovarian cancer cell-secreted exosomal miR-205 promotes metastasis by inducing angiogenesis
Source: PubMed Central journal article supplement (PMC6857047; doi:10.7150/thno.37455), 2019-10-18
Supplement: thnov09p8206s1.pdf [file thnov09p8206s1.pdf]

**Table S1. Relative expression of mir-205 and MVD in OC tissues.**

|         | Relative expression of miR-205 | MVD           |
|---------|--------------------------------|---------------|
| Median  | 0.229                          | 34            |
| Range   | 0.096-0.367                    | 12-85         |
| Mean±SD | 0.228±0.063                    | 40.625±19.539 |

**Table S2. Clinical information of patients in the OC tissues.**

| Patient | Age, years | Sample receipt date, YMD | Stage | Metastasis (No:0; Yes:1) | Histological pattern |
|---------|------------|--------------------------|-------|--------------------------|----------------------|
| 1       | 37         | 2015/3/24                | 3     | 1                        | Ovarian cancer       |
| 2       | 49         | 2017/3/15                | 1     | 0                        | Ovarian cancer       |
| 3       | 55         | 2017/4/11                | 3     | 1                        | Ovarian cancer       |
| 4       | 46         | 2017/5/23                | 2     | 1                        | Ovarian cancer       |
| 5       | 50         | 2017/5/23                | 3     | 1                        | Ovarian cancer       |
| 6       | 60         | 2017/6/9                 | 1     | 0                        | Ovarian cancer       |
| 7       | 57         | 2017/6/13                | 4     | 1                        | Ovarian cancer       |
| 8       | 48         | 2017/6/20                | 3     | 1                        | Ovarian cancer       |
| 9       | 49         | 2017/6/20                | 2     | 1                        | Ovarian cancer       |
| 10      | 44         | 2017/9/29                | 1     | 0                        | Ovarian cancer       |
| 11      | 54         | 2017/10/31               | 3     | 1                        | Ovarian cancer       |
| 12      | 49         | 2017/11/2                | 4     | 1                        | Ovarian cancer       |
| 13      | 59         | 2017/11/7                | 4     | 1                        | Ovarian cancer       |
| 14      | 56         | 2017/11/16               | 1     | 0                        | Ovarian cancer       |
| 15      | 62         | 2017/11/30               | 1     | 0                        | Ovarian cancer       |
| 16      | 61         | 2017/12/1                | 1     | 0                        | Ovarian cancer       |
| 17      | 53         | 2017/12/12               | 2     | 1                        | Ovarian cancer       |
| 18      | 37         | 2017/12/12               | 2     | 1                        | Ovarian cancer       |
| 19      | 53         | 2017/12/12               | 3     | 1                        | Ovarian cancer       |
| 20      | 41         | 2017/12/19               | 2     | 1                        | Ovarian cancer       |
| 21      | 44         | 2017/12/19               | 2     | 1                        | Ovarian cancer       |
| 22      | 45         | 2017/12/22               | 3     | 1                        | Ovarian cancer       |
| 23      | 60         | 2017/12/26               | 3     | 1                        | Ovarian cancer       |

|    |    |            |   |   |                              |
|----|----|------------|---|---|------------------------------|
| 24 | 49 | 2018/1/3   | 1 | 0 | Ovarian cancer               |
| 25 | 64 | 2018/1/26  | 2 | 1 | Ovarian cancer               |
| 26 | 48 | 2018/2/2   | 2 | 1 | Ovarian cancer               |
| 27 | 68 | 2018/2/9   | 2 | 1 | Ovarian cancer               |
| 28 | 65 | 2018/2/9   | 2 | 1 | Ovarian cancer               |
| 29 | 45 | 2018/2/23  | 1 | 0 | Ovarian cancer               |
| 30 | 48 | 2018/3/6   | 2 | 1 | Ovarian cancer               |
| 31 | 43 | 2018/3/8   | 2 | 1 | Ovarian cancer               |
| 32 | 48 | 2018/3/14  | 3 | 1 | Ovarian cancer               |
| 33 | 37 | 2018/3/15  | 2 | 1 | Ovarian cancer               |
| 34 | 47 | 2018/4/8   | 3 | 1 | Ovarian cancer               |
| 35 | 35 | 2018/4/8   | 3 | 1 | Ovarian cancer               |
| 36 | 60 | 2018/4/24  | 3 | 1 | Ovarian cancer               |
| 37 | 37 | 2018/4/28  | 3 | 1 | Ovarian cancer               |
| 38 | 37 | 2018/4/28  | 3 | 1 | Ovarian cancer               |
| 39 | 65 | 2018/5/3   | 3 | 1 | Ovarian cancer               |
| 40 | 38 | 2018/5/11  | 3 | 1 | Ovarian cancer               |
| 41 | 59 | 2015/6/11  | - | - | Normal ovarian tissues       |
| 42 | 54 | 2016/1/12  | - | - | Normal ovarian tissues       |
| 43 | 37 | 2016/5/26  | - | - | Normal ovarian tissues       |
| 44 | 53 | 2016/10/27 | - | - | Normal ovarian tissues       |
| 45 | 49 | 2017/3/15  | - | - | Normal ovarian tissues       |
| 46 | 50 | 2017/3/15  | - | - | Normal ovarian tissues       |
| 47 | 55 | 2017/4/11  | - | - | Normal ovarian tissues       |
| 48 | 33 | 2017/9/20  | - | - | Normal ovarian tissues       |
| 49 | 33 | 2017/9/20  | - | - | Normal ovarian tissues       |
| 50 | 44 | 2017/9/29  | - | - | Normal ovarian tissues       |
| 51 | 50 | 2017/12/19 | - | - | Normal ovarian tissues       |
| 52 | 44 | 2017/12/19 | - | - | Normal ovarian tissues       |
| 53 | 60 | 2017/12/26 | - | - | Normal ovarian tissues       |
| 54 | 41 | 2018/4/3   | - | - | Normal ovarian tissues       |
| 55 | 56 | 2018/4/27  | - | - | Normal ovarian tissues       |
| 56 | 52 | 2018/4/27  | - | - | Normal ovarian tissues       |
| 57 | 55 | 2018/4/28  | - | - | Normal ovarian tissues       |
| 58 | 42 | 2018/5/8   | - | - | Normal ovarian tissues       |
| 59 | 48 | 2018/5/18  | - | - | Normal ovarian tissues       |
| 60 | 56 | 2018/5/23  | - | - | Normal ovarian tissues       |
| 61 | 48 | 2018/5/29  | - | - | Distant metastatic carcinoma |

|    |    |            |   |   |                                 |
|----|----|------------|---|---|---------------------------------|
| 62 | 50 | 2014/12/26 | - | - | Distant metastatic carcinoma    |
| 63 | 50 | 2017/11/17 | - | - | Distant metastatic carcinoma    |
| 64 | 60 | 2018/04/24 | - | - | Abdominal metastatic carcinoma  |
| 65 | 44 | 2018/04/28 | - | - | Abdominal metastatic carcinoma  |
| 66 | 65 | 2018/05/04 | - | - | Abdominal metastatic carcinoma  |
| 67 | 48 | 2018-02-02 | - | - | Lymph node metastatic carcinoma |
| 68 | 47 | 2017-11-10 | - | - | Lymph node metastatic carcinoma |

**Table S3. Clinical information of OC patients and healthy volunteers in the circulating exosomes study.**

| Patient | Age, years | Sample receipt date, YMD | Metastasis (No:0; Yes:1) | Histological pattern |
|---------|------------|--------------------------|--------------------------|----------------------|
| 1       | 53         | 2017/12/19               | 0                        | Serum sample         |
| 2       | 58         | 2017/12/20               | 1                        | Serum sample         |
| 3       | 47         | 2017/12/26               | 0                        | Serum sample         |
| 4       | 38         | 2017/12/26               | 1                        | Serum sample         |
| 5       | 53         | 2017/12/27               | 1                        | Serum sample         |
| 6       | 47         | 2017/12/28               | 0                        | Serum sample         |
| 7       | 52         | 2018/1/18                | 0                        | Serum sample         |
| 8       | 49         | 2018/1/19                | 0                        | Serum sample         |
| 9       | 28         | 2018/02/02               | healthy                  | Serum sample         |
| 10      | 29         | 2018/02/02               | healthy                  | Serum sample         |
| 11      | 23         | 2018/02/02               | healthy                  | Serum sample         |
| 12      | 25         | 2018/02/02               | healthy                  | Serum sample         |
| 13      | 26         | 2018/02/02               | healthy                  | Serum sample         |

**Table S4. The sequences used in this study**

| Primer | Sequence (5'→3') |
|--------|------------------|
|--------|------------------|

|                          |                        |
|--------------------------|------------------------|
| Cel-miR-239b-5p          | UUUGUACUACACAAAAGUACUG |
| hsa-miR-205 mimic        | UCCUUCAUCCACCGGAGUCUG  |
| hsa-miR-205 nc           | UUUGUACUACACAAAAGUACUG |
| hsa-miR-205-5p inhibitor | CAGACUCCGGUGGAAUGAAGGA |
| PTEN-si1                 | GGAATATCTAGTACTTACT    |
| PTEN-si2                 | GGTGAATGATATGTGCAT     |
| PTEN-si3                 | ACCGCCAAATTTAATTGCA    |
| Flag-PTEN Forward        | AGGCACTGGGCAGGTAAG     |
| Flag-PTEN Reverse        | CTGGAATAGCTCAGAGGC     |
| PTEN Forward             | CCTCAGCCGTTACCTGTGTG   |
| PTEN Reverse             | TCTGGATTTGACGGCTCCTCT  |

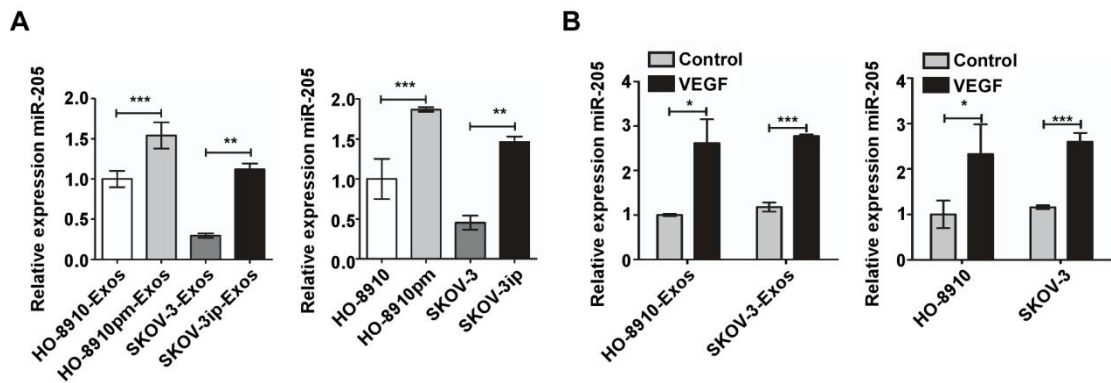

**Supplementary Figure S1: Expression level of miR-205 in cells can affect the expression levels of miR-205 in exosomes** (A) The expression levels of miR-205 in OCCs and exosomes were measured by RT-PCR. (B) RT-PCR was used to detect the levels of miR-205 in cells and exosomes after treatment with VEGF<sub>165</sub>. All data are shown as the mean  $\pm$  SEM from at least three independent experiments. \* $P < 0.05$ , \*\* $P < 0.01$  and \*\*\* $P < 0.001$ , Student's *t* test.

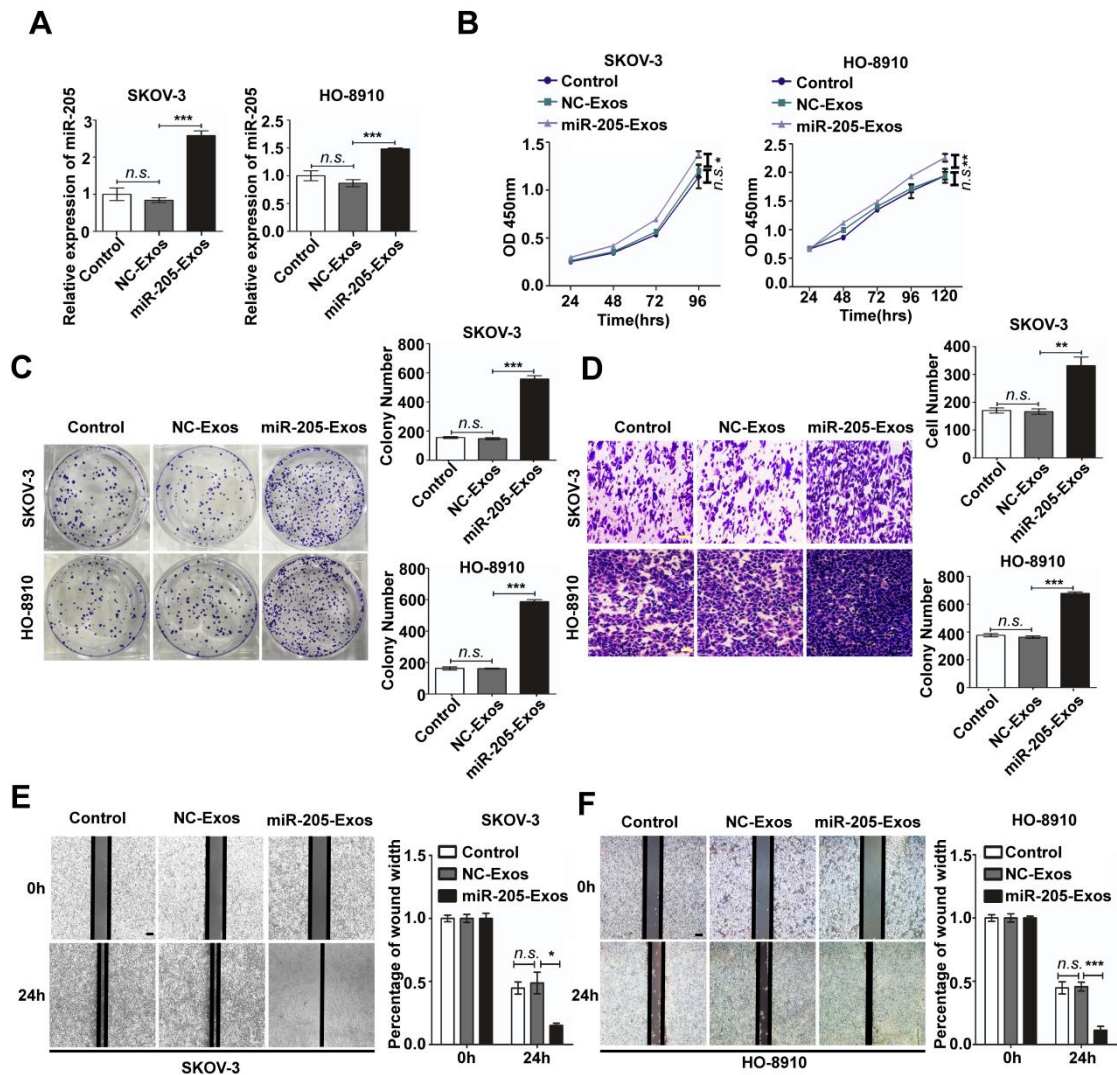

**Supplementary Figure S2: Exosomal miR-205 promotes invasion and metastasis in OCCs.** (A) After treatment with the miR-205-Exos, NC-Exos and Control (blank control), the miR-205 levels of HO-8910 and SKOV-3 cells were measured by RT-PCR. (B) The cell proliferation of HO-8910 and SKOV-3 cells was measured by the CCK-8 assay after treatment with exosomes. (C) After incubated with exosomes, cell proliferation of HO-8910 and SKOV-3 cells was assessed by colony formation. (D) The transwell invasion assay was performed to measure the cell invasion ability of HO-8910 and SKOV-3 cells treated with exosomes. The scale bar represents 50  $\mu\text{m}$ . (E, F) The wound closure assay was performed to measure the effect of exosomal miR-205 on the migration of OCCs. The scale bar represents 100  $\mu\text{m}$ . All the in vitro experiments were repeated three times. The results are presented as the mean $\pm$ SEM. Statistical significance was determined by a two-tailed, unpaired Student's t-test. \* $P < 0.05$ , \*\* $P < 0.01$  and \*\*\* $P < 0.001$ . *n.s.*, not significant.



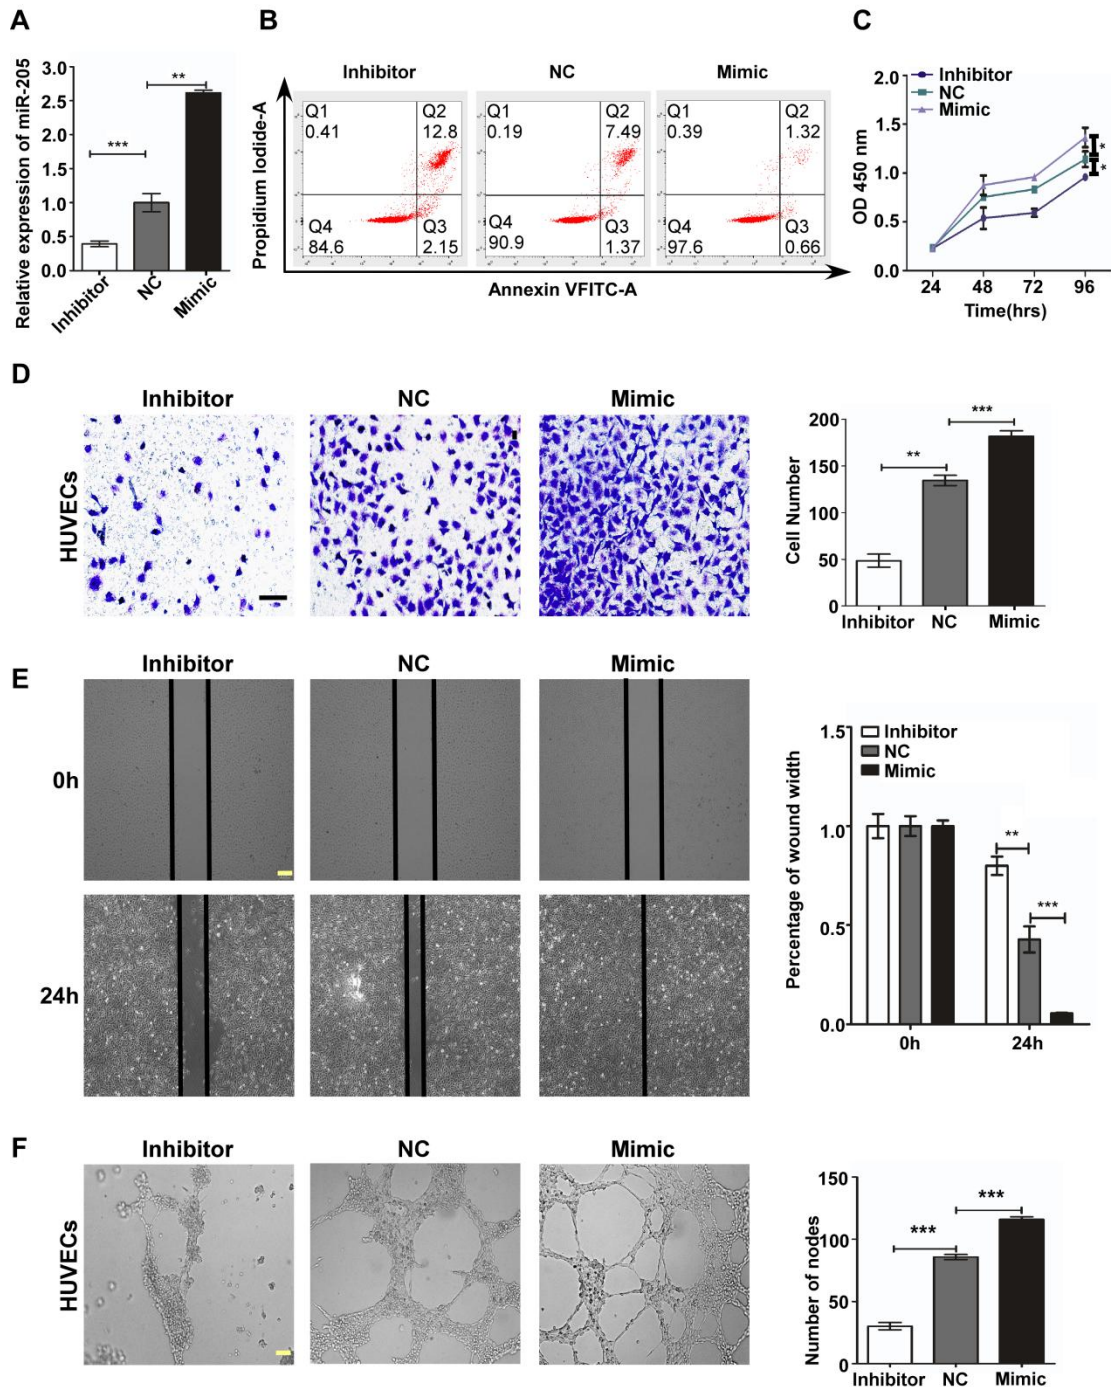

**Supplementary Figure S4. miR-205 regulates in vitro angiogenesis.** (A) Transfection efficiency was measured by RT-PCR. (B) Analysis of apoptosis was performed at 24 h after transfection. (C) The CCK-8 assay was used to measure the effect of miR-205 on HUVEC cell growth. (D) Transwell assays were applied to measure cell migration. The scale bar represents 50  $\mu$ m. (E) The wound closure assay showed cell migration by transfected HUVECs. The scale bar represents 100  $\mu$ m. (F) The tube formation assay was performed with HUVECs after transfection. The scale bar represents 100  $\mu$ m. All in vitro experiments were performed in triplicate and repeated three times. The results are presented as the mean  $\pm$  SEM. Statistical significance was determined by a two-tailed,

unpaired Student's *t* test. \**P* < 0.05, \*\**P* < 0.01 and \*\*\**P* < 0.001

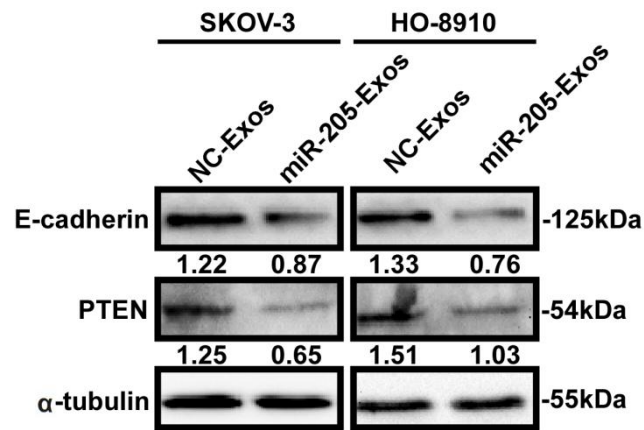

**Supplementary Figure S5: Exosomal miR-205 decreases the protein levels of PTEN and E-cadherin in OCCs.**

(A) Western blotting analysis of E-cadherin, PTEN,  $\alpha$ -tubulin in HO-8910 and SKOV-3 cells incubated with NC-Exos, miR-205-Exos.
